# Supplementary material for: Heartwood Relationship with Stem Diameter in Pinus canariensis Plantations of Gran Canaria, Spain
Source: MDPI journal article supplement (doi:10.3390/f14091719), 2023-08-25
Supplement: s1 [file s1]

# Supplementary Materials for

## Heartwood Relationship with Stem Diameter in *Pinus canariensis* Plantations of Gran Canaria, Spain

Luis Fernando Arencibia Aguilar <sup>1</sup>, Priscila Rodríguez Rodríguez <sup>1</sup> and Franco Biondi <sup>2,\*</sup>

<sup>1</sup> Instituto Universitario de Estudios Ambientales y Recursos Naturales (IUNAT), Universidad de las Palmas de Gran Canaria, 35001 Las Palmas, Canary Islands, Spain;

lfarencibia@grancanaria.com (L.F.A.A.); priscila.rodriguez@ulpgc.es (P.R.R.)

<sup>2</sup> DendroLab, Department of Natural Resources and Environmental Science, University of Nevada, Reno, NV 89557, USA

\* Correspondence: franco.biondi@gmail.com; Tel.: +1-775-784-6921

### This file includes:

Figure S1: Cut stem showing the cross-sectional color difference between heartwood and sapwood in *Pinus canariensis*.

Figure S2: Cut stem showing the cross-sectional decay resistance of heartwood compared to sapwood in *Pinus canariensis*.

Figure S2: Walter-Lieth climate diagram for a representative station.

Figure S3: Walter-Lieth climate diagram for a representative station.

Figure S4: The first author coring a *Pinus canariensis* on one of the study plots.

Figure S5: The Applequist estimator for average ring width of 2.5 mm.

Figure S6: Paired sample linear correlations between plot and tree variables.

Figure S7: Omnidirectional sample variogram and fitted exponential model for heartwood radius.

Table S1: Summary information for sampled plots.

Table S2. Output of mixed effects models estimated using R packages.

**Figure S1.** Cut stem showing the cross-sectional color difference between heartwood and sapwood in *Pinus canariensis* (photo credit: Juan Guzmán Ojeda).

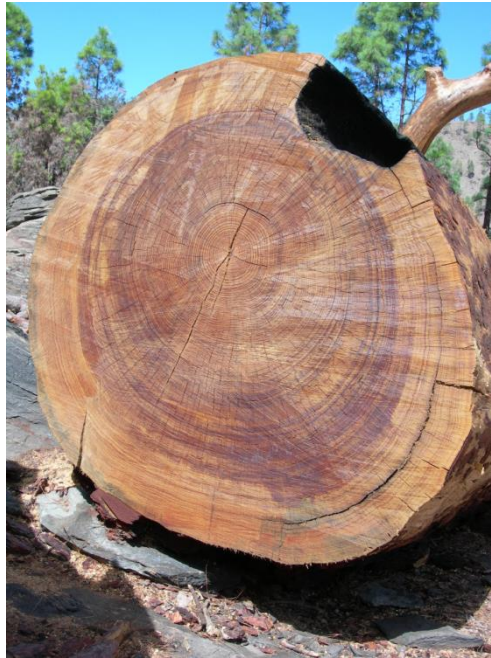

**Figure S2:** Cut stem showing the cross-sectional decay resistance of heartwood compared to sapwood in *Pinus canariensis*.

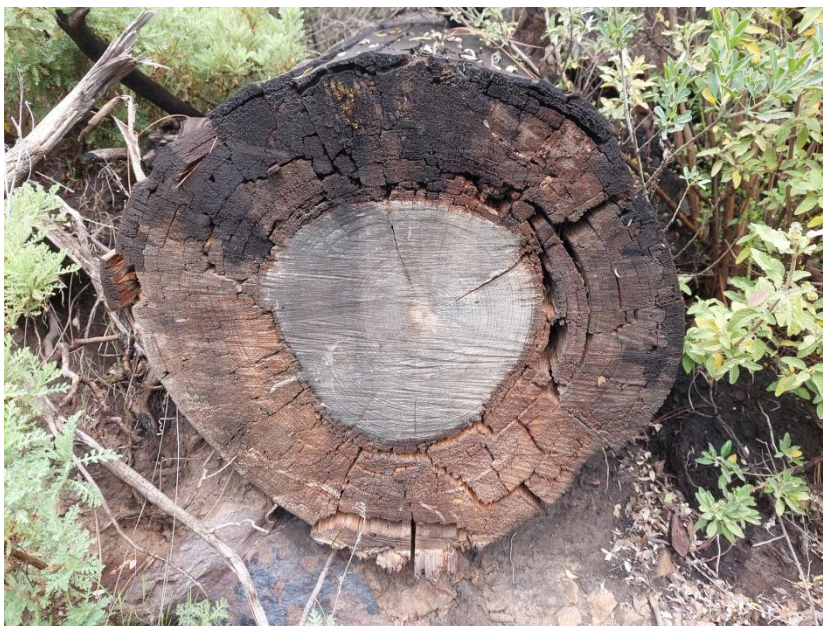

**Figure S3.** Walter-Lieth climate diagram for a representative station with temperature (red curve and labels) on the left y axis and total precipitation (blue curve and labels) on the right one. Despite the relatively high elevation of the study area, the wet season (blue vertical lines) is limited to the winter months (D-F), while the rest of the year is characterized by dry conditions (red vertical dashes).

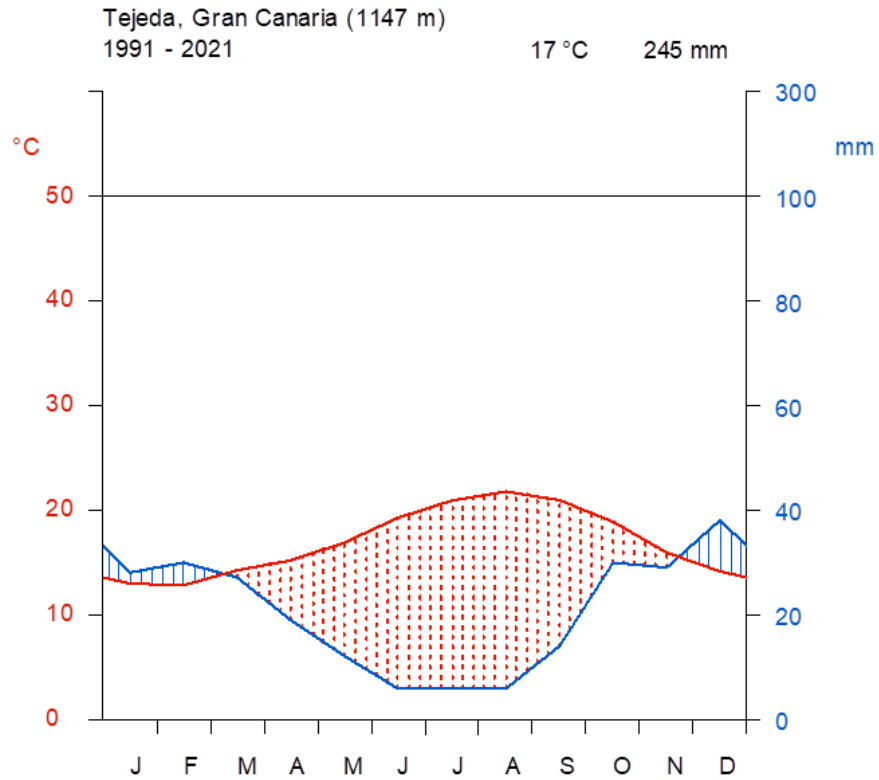



**Figure S4.** The first author coring a *Pinus canariensis* (pine #14) on one of the study plots.

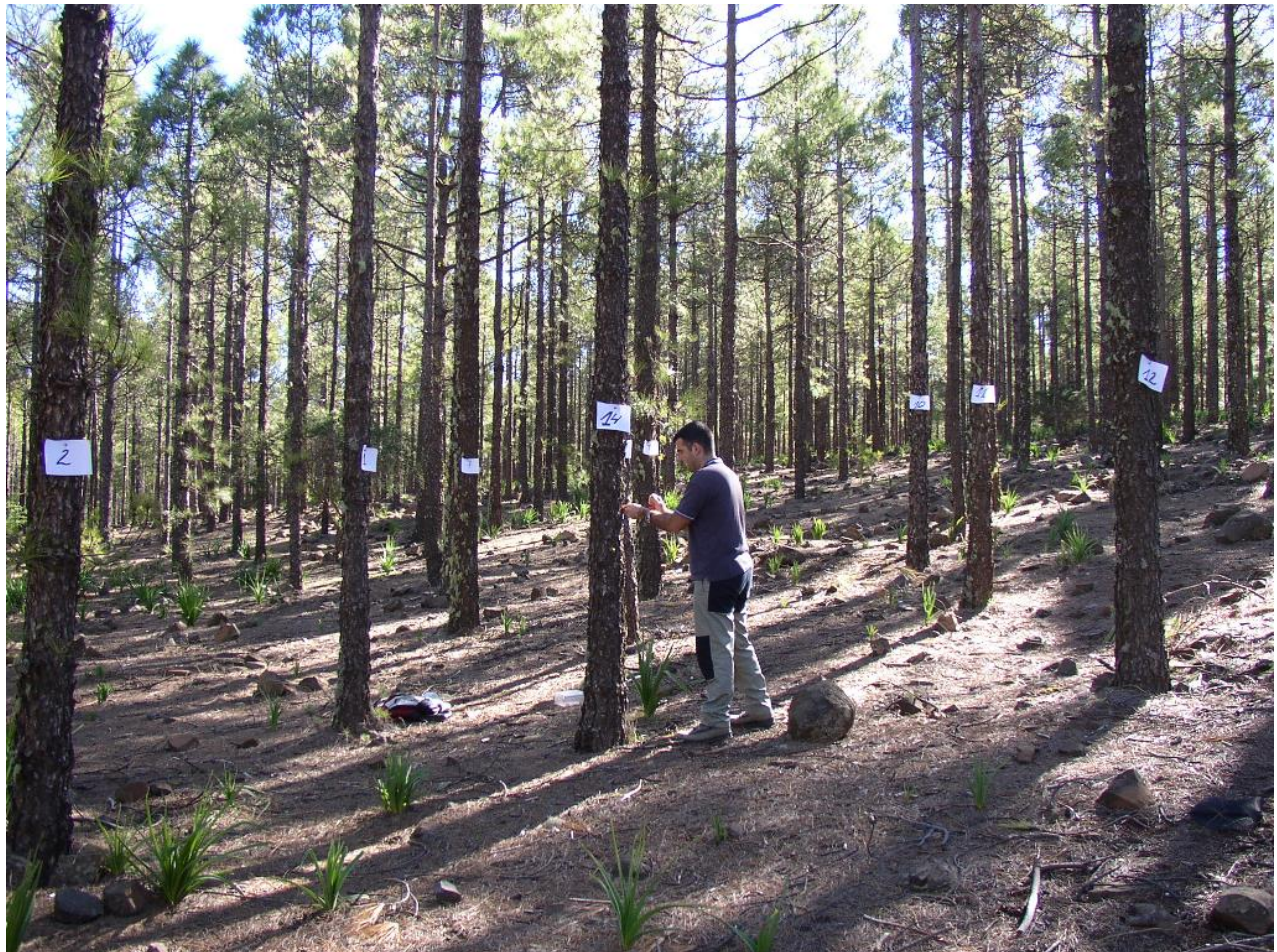

**Figure S5.** The Applequist estimator for average ring width of 2.5 mm, which is obtained by including 20 concentric, equally spaced rings inside a circle with diameter of 50 mm.

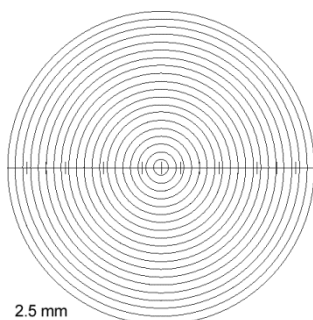



**Figure S7.** Omnidirectional sample variogram (blue dots and connecting segments) and fitted exponential model (blue line) for heartwood radius (Rtea) at the study area. A spherical model could also have been fitted, which, together with a relatively low difference between the nugget value (y-intercept of blue line) and the sill (asymptotically horizontal portion of the blue line) suggested an overall limited amount of spatial autocorrelation.

#### Omnidirection Variogram and Exponential Model for Heartwood Radius

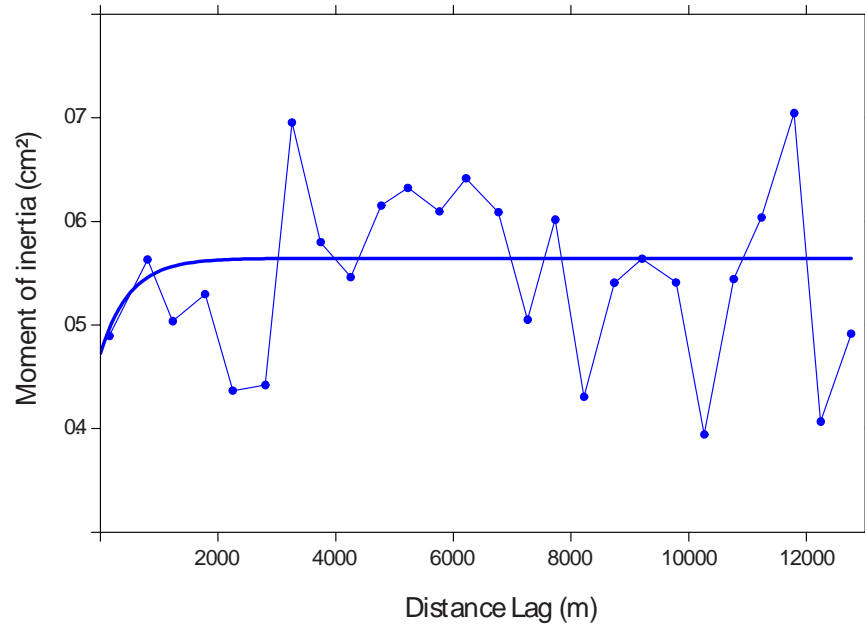

**Table S1.** Summary information for sampled plots (# 4, 5 and 8 are included in Figure 1). Geographical coordinates are in the Universal Transverse Mercator (“UTM”) system (zone 28N). The stand “Density Index” was calculated using the linear distances from the plot center to the nearest 15<sup>th</sup> and 30<sup>th</sup> tree. “Sky View” and Topographic Wetness Index (“TWI”) values were calculated from a 30-m Digital Elevation Model (DEM) to estimate, respectively, site insolation and moisture (Figure 2).

| Plot # | Elevation (m) | X_UTM (m) | Y_UTM (m) | Thinned | Slope (%) | Exposure (°) | Density Index (n ha <sup>-1</sup> ) | Sky View | TWI       |
|--------|---------------|-----------|-----------|---------|-----------|--------------|-------------------------------------|----------|-----------|
| 1      | 1875          | 444391    | 3093283   | Yes     | 15        | 5            | 194                                 | 0.34048  | -16.02606 |
| 2      | 1680          | 442622    | 3094739   | Yes     | 11        | 0/360        | 155                                 | 0.17165  | -16.13523 |
| 3      | 1705          | 442258    | 3094069   | Yes     | 33        | 142          | 89                                  | 0.00000  | -16.39934 |
| 4      | 1680          | 442874    | 3093703   | No      | 44        | 39           | 129                                 | 0.08781  | -15.09456 |
| 5      | 1735          | 443310    | 3093785   | No      | 19        | 328          | 166                                 | 0.35463  | -15.05277 |
| 6      | 1655          | 446344    | 3093938   | Yes     | 58        | 214          | 162                                 | 0.00000  | -17.19556 |
| 7      | 1605          | 446845    | 3093754   | Yes     | 49        | 151          | 687                                 | 0.10892  | -16.75226 |
| 8      | 1830          | 443747    | 3093622   | Yes     | 26        | 0/360        | 113                                 | 0.00000  | -14.91591 |
| 9      | 1695          | 443718    | 3094467   | No      | 47        | 330          | 159                                 | 0.50751  | -17.33732 |
| 10     | 1555          | 440357    | 3100176   | No      | 49        | 160          | 121                                 | 0.19206  | -16.49754 |
| 11     | 1690          | 440252    | 3099367   | Yes     | 40        | 315          | 91                                  | 0.46853  | -17.08072 |
| 12     | 1665          | 446749    | 3093190   | No      | 53        | 286          | 200                                 | 0.00000  | -17.03066 |
| 13     | 1695          | 446403    | 3093918   | No      | 51        | 80           | 196                                 | 0.32983  | -16.16746 |
| 14     | 1575          | 447938    | 3091833   | No      | 60        | 45           | 171                                 | 0.17238  | -16.11971 |
| 15     | 1480          | 439151    | 3101936   | Yes     | 70        | 295          | 97                                  | 0.44644  | -16.73437 |
| 16     | 1455          | 438628    | 3101671   | No      | 58        | 260          | 173                                 | 0.45648  | -14.63678 |
| 17     | 1480          | 439645    | 3101253   | No      | 53        | 90           | 175                                 | 0.12930  | -13.25992 |
| 18     | 1585          | 439691    | 3100421   | No      | 9         | 280          | 148                                 | 0.00000  | -12.31515 |
| 19     | 1585          | 439929    | 3100872   | No      | 53        | 285          | 181                                 | 0.45203  | -16.45677 |
| 20     | 1570          | 439408    | 3100888   | No      | 27        | 108          | 269                                 | 0.33521  | -13.11000 |
| 21     | 1590          | 441217    | 3099364   | Yes     | 24        | 30           | 172                                 | 0.11612  | -15.20418 |
| 22     | 1225          | 444088    | 3098168   | No      | 49        | 295          | 153                                 | 0.15197  | -16.78119 |
| 23     | 1495          | 438160    | 3099605   | Yes     | 27        | 0            | 191                                 | 0.16837  | -16.96772 |
| 24     | 1575          | 438585    | 3099461   | Yes     | 41        | 200          | 167                                 | 0.06473  | -17.41026 |
| 25     | 1435          | 437543    | 3099684   | Yes     | 9         | 270          | 167                                 | 0.01307  | -16.05485 |
| 26     | 1005          | 433594    | 3099945   | No      | 4         | 180          | 284                                 | 0.00000  | -16.87134 |
| 27     | 1060          | 443342    | 3101151   | No      | 11        | 210          | 118                                 | 0.17875  | -17.45985 |
| 28     | 995           | 433956    | 3100681   | Yes     | 33        | 96           | 123                                 | 0.00000  | -16.74466 |
| 29     | 1240          | 435339    | 3099875   | No      | 60        | 205          | 120                                 | 0.19153  | -16.02298 |
| 30     | 1680          | 446480    | 3092234   | No      | 36        | 215          | 169                                 | 0.45648  | -16.39285 |

**Table S2.** Output of mixed effects models estimated using R packages.**(a)** GLMM (one fixed effect) estimated by *nlme*

Linear mixed-effects model fit by REML

|          |          |           |
|----------|----------|-----------|
| AIC      | BIC      | logLik    |
| 884.0288 | 916.8672 | -434.0144 |

Random effects:

Formula: ~1 + Diam | fPlot

Structure: General positive-definite, Log-Cholesky parametrization

|             |            |        |
|-------------|------------|--------|
|             | StdDev     | Corr   |
| (Intercept) | 0.51449420 | (Intr) |
| Diam        | 0.03070529 | -0.969 |
| Residual    | 0.59219516 |        |

Correlation Structure: Exponential spatial correlation

Formula: ~XUTMm + YUTMm | fPlot

Parameter estimate(s):

|             |           |
|-------------|-----------|
| Range       | nugget    |
| 491.4657137 | 0.9979945 |

Fixed effects: Rtea ~ 1 + Diam

|             |            |            |     |           |         |
|-------------|------------|------------|-----|-----------|---------|
|             | Value      | Std.Error  | DF  | t-value   | p-value |
| (Intercept) | -0.7276459 | 0.15133592 | 419 | -4.808151 | 0       |
| Diam        | 0.0522202  | 0.00757851 | 419 | 6.890569  | 0       |

Correlation:

|      |        |
|------|--------|
|      | (Intr) |
| Diam | -0.955 |

Standardized Within-Group Residuals:

|            |            |            |           |           |
|------------|------------|------------|-----------|-----------|
| Min        | Q1         | Med        | Q3        | Max       |
| -2.6089875 | -0.5710996 | -0.1453637 | 0.3372145 | 3.6477256 |

**(b)** GLMM (one fixed effect) estimated by *glmmML*

Call: glmmML(formula = RteaB ~ 1 + Diam, family = binomial, data = out, cluster = RandomPlot)

|             |          |          |         |          |
|-------------|----------|----------|---------|----------|
|             | coef     | se(coef) | z       | Pr(> z ) |
| (Intercept) | -0.03807 | 0.20807  | -0.1829 | 0.855    |
| Diam        | 0.08895  | 0.01944  | 4.5758  | 4.74e-06 |

Scale parameter in mixing distribution: 0.9761 gaussian

Std. Error: 0.1871

LR p-value for H<sub>0</sub>: sigma = 0: 3.223e-10

Residual deviance: 565.1 on 447 degrees of freedom AIC: 571.1

**(c)** GLMM (two fixed effects) estimated by *nlme*

Linear mixed-effects model fit by REML

|          |          |           |
|----------|----------|-----------|
| AIC      | BIC      | logLik    |
| 896.9126 | 937.9157 | -438.4563 |

Random effects:

Formula: ~1 + Diam | fPlot

Structure: General positive-definite, Log-Cholesky parametrization

|             |            |        |
|-------------|------------|--------|
|             | StdDev     | Corr   |
| (Intercept) | 0.51096094 | (Intr) |
| Diam        | 0.03085406 | -0.969 |
| Residual    | 0.59267040 |        |

Correlation Structure: Exponential spatial correlation

Formula: ~XUTMm + YUTMm | fPlot

Parameter estimate(s):



---

|             |           |  |  |  |  |
|-------------|-----------|--|--|--|--|
| Range       | nugget    |  |  |  |  |
| 502.7884099 | 0.9986758 |  |  |  |  |

Fixed effects: Rtea ~ 1 + Diam \* Thinned

|              | Value      | Std.Error  | DF  | t-value   | p-value |
|--------------|------------|------------|-----|-----------|---------|
| (Intercept)  | -0.8320463 | 0.20370564 | 418 | -4.084552 | 0.0001  |
| Diam         | 0.0570172  | 0.01023653 | 418 | 5.569974  | 0.0000  |
| Thinned      | 0.2331077  | 0.30375921 | 28  | 0.767410  | 0.4493  |
| Diam:Thinned | -0.0106749 | 0.01530051 | 418 | -0.697685 | 0.4858  |

Correlation:

|              | (Intr) | Diam   | Thinned |
|--------------|--------|--------|---------|
| Diam         | -0.955 |        |         |
| Thinned      | -0.671 | 0.640  |         |
| Diam:Thinned | 0.639  | -0.669 | -0.954  |

Standardized Within-Group Residuals:

| Min        | Q1         | Med        | Q3        | Max       |
|------------|------------|------------|-----------|-----------|
| -2.6637707 | -0.5663838 | -0.1491465 | 0.3173857 | 3.6985685 |

---

**(d)** GLMM (two fixed effects) estimated by *glmmML*

---

Call: `glmmML(formula = RteaB ~ 1 + Diam + R5, family = binomial, data = out, cluster = RandomPlot)`

|             | Coef     | se(coef) | z       | Pr(> z ) |
|-------------|----------|----------|---------|----------|
| (Intercept) | -0.03308 | 0.21774  | -0.1519 | 0.879    |
| Diam        | 0.12213  | 0.02531  | 4.8263  | 1.39e-06 |
| R5          | -0.34432 | 0.15541  | -2.2155 | 0.0267   |

Scale parameter in mixing distribution: 1.034 gaussian  
Std. Error: 0.195

LR p-value for H<sub>0</sub>: sigma = 0: 4.981e-11  
Residual deviance: 560 on 446 degrees of freedom      AIC: 568

---

**(e)** GLMM (two fixed effects) estimated by function *glmmPQL* from *MASS*

---

Linear mixed-effects model fit by maximum likelihood

Random effects:

Formula: ~1 | fPlot

|         | (Intercept) | Residual  |
|---------|-------------|-----------|
| StdDev: | 0.9886244   | 0.9618006 |

Variance function:

Structure: fixed weights

Formula: ~invwt

Fixed effects: RteaB ~ 1 + Diam + R5

|             | Value      | Std.Error  | DF  | t-value   | p-value |
|-------------|------------|------------|-----|-----------|---------|
| (Intercept) | -0.0304602 | 0.20766831 | 418 | -0.146677 | 0.8835  |
| Diam        | 0.1164294  | 0.02307112 | 418 | 5.046543  | 0.0000  |
| R5          | -0.3300212 | 0.14387653 | 418 | -2.293780 | 0.0223  |

Correlation:

|      | (Intr) | Diam   |
|------|--------|--------|
| Diam | 0.017  |        |
| R5   | -0.015 | -0.607 |

Standardized Within-Group Residuals:

| Min        | Q1         | Med        | Q3        | Max       |
|------------|------------|------------|-----------|-----------|
| -4.1259610 | -0.7966016 | -0.3182852 | 0.8189689 | 2.3383799 |

---
